# Supplementary material
Source: PubMed Central journal article supplement (PMC2978914)
Supplement: neo1211_0915SD1.pdf [file neo1211_0915SD1.pdf]

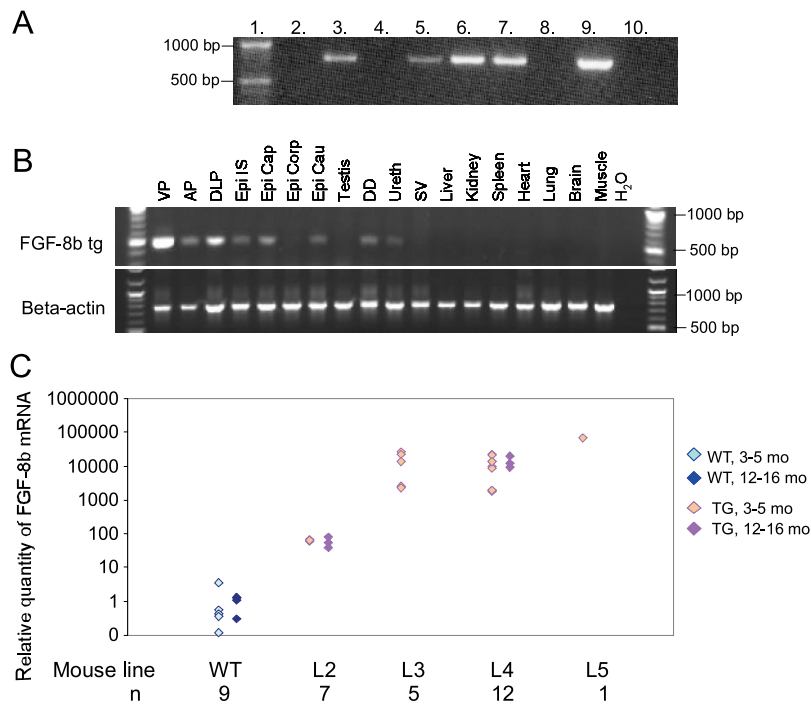

**Figure W1.** Generation and expression analysis of FGF-8b transgenic mice. (A) Genotyping PCR with primers specific for the transgene construct resulted in a 762-bp product from DNA samples from mice positive for the transgene (lanes 3, 5, 6, 7, and 9) and no product from WT mice (lanes 2, 4, and 8). Lane 10: negative control. (B) Analysis of *FGF-8b* expression by way of transgene-specific RT-PCR using tissues of a 3-month-old TG mouse (L4). *β-Actin* was used as an internal control for cDNA synthesis. DD indicates ductus deferens; Epi Cap, epididymis caput; Epi Cau, epididymis cauda; Epi corp, epididymis corpus; Epi IS, epididymis initial segment; SV, seminal vesicles. (C) Relative quantity of FGF-8b mRNA in VPs of WT mice and TG mice (3-5 and 12-16 months old) from different FGF-8b TG mouse lines (L2, L3, L4, and L5) studied by qRT-PCR. mo indicates months old.

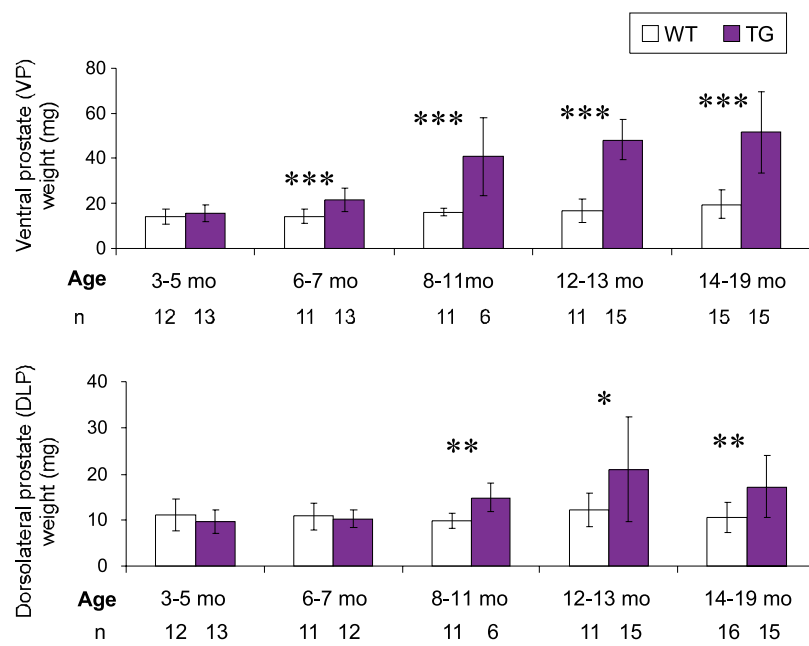

**Figure W2.** Weights of VP and DLP of FGF-8b-TG and WT mice in five age groups. The columns show mean  $\pm$  SD. One case with a very large carcinosarcoma tumor in the VP (weight, 3871 mg) has been excluded from the oldest (14- to 19-month-old) TG group for clarity. Statistical significance was assessed with the Student's *t* test (VP) or with the Mann-Whitney *U* test (DLP). \*\*\**P* < .001, \*\**P* < .01, \**P* < .05. mo indicates months old.

**Table W1.** Frequencies of Histologic Changes in Prostate in Three Age Groups.

|                                      | 3-6 months          |                     | 7-11 months         |                     | 12-21 months        |                     |
|--------------------------------------|---------------------|---------------------|---------------------|---------------------|---------------------|---------------------|
|                                      | WT ( <i>n</i> = 15) | TG ( <i>n</i> = 18) | WT ( <i>n</i> = 12) | TG ( <i>n</i> = 18) | WT ( <i>n</i> = 15) | TG ( <i>n</i> = 32) |
| Dilatation of glands                 | —                   | 33                  | —                   | 44                  | 7                   | 76                  |
| Mucinous metaplasia                  | —                   | 17                  | 8                   | 38                  | 20                  | 42                  |
| Epithelial hypercellularity          | 31                  | 61                  | 8                   | 75                  | 20                  | 74                  |
| Epithelial hyperplasia with atypia   | —                   | 11                  | —                   | 38                  | —                   | 53                  |
| mPIN                                 | —                   | —                   | —                   | 19                  | —                   | 47                  |
| Adenocarcinoma                       | —                   | —                   | —                   | —                   | —                   | 8                   |
| Inflammation*                        | 13                  | 17                  | 25                  | 50                  | 13                  | 58                  |
| Stromal hypercellularity             | 19                  | 56                  | 0                   | 38                  | 7                   | 71                  |
| Stromal hypercellularity with atypia | —                   | —                   | —                   | 6                   | —                   | 32                  |
| Sarcoma <sup>†</sup>                 | —                   | —                   | —                   | —                   | —                   | 16                  |

\*Includes all degrees of inflammation (score, 0-3).

<sup>†</sup>Includes carcinosarcomas.

**Table W2.** Predictive Ability for mPIN Lesions of Age-Adjusted Variables Studied by Logistic Regression Analysis.

| Variable                 | <i>P</i> | OR (CI)            |
|--------------------------|----------|--------------------|
| Mucinous metaplasia      | <.001    | 10.93 (2.99-39.93) |
| Epithelial hyperplasia   | .012     | 11.07 (1.04-91.78) |
| Stromal hypercellularity | <.001    | 8.60 (2.50-29.60)  |
| Inflammation             | <.001    | 12.26 (3.02-49.84) |

*P* values, odds ratios (OR), and 95% confidence intervals (CI) are given.
